# Supplementary material
Source: Springer Nature journal article supplement (https://www.springermedizin.de/resource/supplementary/12879_2005_326_MOESM1_ESM.pdf/9448786)
Supplement: MOESM1 [file 9448786]

|                                    |            |            |            |            |            |                   |
|------------------------------------|------------|------------|------------|------------|------------|-------------------|
|                                    | .... ....  | .... ....  | .... ....  | .... ....  | .... ....  | .... ....         |
|                                    | 5          | 15         | 25         | 35         | 45         | 55                |
| <b>B.pertussis ATCC 9797</b>       | CGTCCGGCCG | GCACCATCCC | GCATACGTGT | TGGCAACCCG | CAACGCGCAT | <b>GCGTGCAGAT</b> |
| <b>B.bronchiseptica AB 1254</b>    | CGTCCGGCCG | GCACCATCCC | GCATACGTGT | TGGCAACCCG | CAACGCGTAT | GCGCGCGGAT        |
| <b>B.bronchiseptica ATCC 786</b>   | CGTCCGGCCG | GCACCATCCC | GCATACGTGT | TGGCAACCCG | CAACGCGTAT | GCGCGCGGAT        |
| <b>B.bronchiseptica ATCC 19395</b> | CGTCCGGCTG | GCACCATCCC | GCATACGTGT | TGGCAACCCG | CAACGCGTAT | GCGCGCGGAT        |
| <b>B.parapertussis KP92\83\93</b>  | CGTCCGGCCG | GCACCATCCC | GCATACGTGT | TGGCAACCCG | CAACGCGTAT | GCGCGCGGAT        |
| <b>B.parapertussis KP92\437\93</b> | CGTCCGGCCG | GCACCATCCC | GCATACGTGT | TGGCAACCCG | CAACGCGTAT | GCGCGCGGAT        |
| <b>B.parapertussis ATCC 15311</b>  | CGTCCGGCCG | GCACCATCCC | GCATACGTGT | TGGCAACCCG | CAACGCGTAT | GCGCGCGGAT        |

|                                    |                  |            |                    |                   |            |            |
|------------------------------------|------------------|------------|--------------------|-------------------|------------|------------|
|                                    | .... ....        | .... ....  | .... ....          | .... ....         | .... ....  | .... ....  |
|                                    | 65               | 75         | 85                 | 95                | 105        | 115        |
| <b>B.pertussis ATCC 9797</b>       | <b>TCG</b> ----- | ---TCGTACA | AA <b>ACCCTCGA</b> | <b>TTCTTCCGTA</b> | CATCCCGCTA | CTGCAATCCA |
| <b>B.bronchiseptica AB 1254</b>    | GCG-----         | ---TCGCACA | AAGCCCTCGA         | TTCTTCCGCA        | CATCCCGCTA | CTGCAATCCA |
| <b>B.bronchiseptica ATCC 786</b>   | GCG-----         | ---TCGCACA | AAGCCCTCGA         | TTCTTCCGCA        | CATCCCGCTA | CTGCAATCCA |
| <b>B.bronchiseptica ATCC 19395</b> | GCGGCGGGAT       | GCGTCGCACA | AAGCCCTCGA         | TCCTTCCGCA        | CATCCCGCTA | CTGCAATCCA |
| <b>B.parapertussis KP92\83\93</b>  | GCGGCGGGAT       | GCGTCGCACA | AAGCCCTCAA         | TCCTTCCGCA        | CATCCCGCTA | CTGTAATCCA |
| <b>B.parapertussis KP92\437\93</b> | GCGGCGGGAT       | GCGTCGCACA | AAGCCCTCAA         | TCCTTCCGCA        | CATCCCGCTA | CTGTAATCCA |
| <b>B.parapertussis ATCC 15311</b>  | GCGGCGGGAT       | GCGTCGCACA | AAGCCCTCAA         | TCCTTCCGCA        | CATCCCGCTA | CTGTAATCCA |

|                                    |            |            |            |            |             |            |
|------------------------------------|------------|------------|------------|------------|-------------|------------|
|                                    | .... ....  | .... ....  | .... ....  | .... ....  | .... ....   | .... ....  |
|                                    | 125        | 135        | 145        | 155        | 165         | 175        |
| <b>B.pertussis ATCC 9797</b>       | ACACGGCATG | AACGCTCCTT | CGGCGCAAAG | TCGCGCGATG | GTACCGGTCA  | CCGTCCGGAC |
| <b>B.bronchiseptica AB 1254</b>    | ACACGGCGCG | AACGCTCCTT | CGGCGCAAAG | TCGCACGATG | GTACCGGTGCG | CCGTCCAGAC |
| <b>B.bronchiseptica ATCC 786</b>   | ACACGGCGCG | AACGCTCCTT | CGGCGCAAAG | TCGCACGATG | GTACCGGTGCG | CCGTCCAGAC |
| <b>B.bronchiseptica ATCC 19395</b> | ACACGGCGCG | AACGCCCCCT | CGGCGCAAAG | TGCGACGATG | GTACCGGTGCG | CCGTCCGGAC |
| <b>B.parapertussis KP92\83\93</b>  | ACACGGCGCA | AACGCCCCCT | CGGCGCAAAG | TCGCACGATG | GTACCGGTGCG | CCGTCCGGAC |
| <b>B.parapertussis KP92\437\93</b> | ACACGGCGCA | AACGCCCCCT | CGGCGCAAAG | TCGCACGATG | GTACCGGTGCG | CCGTCCGGAC |
| <b>B.parapertussis ATCC 15311</b>  | ACACGGCGCA | AACGCCCCCT | CGGCGCAAAG | TCGCACGATG | GTACCGGTGCG | CCGTCCGGAC |

|                                    |            |            |            |                              |                    |            |
|------------------------------------|------------|------------|------------|------------------------------|--------------------|------------|
|                                    | .... ....  | .... ....  | .... ....  | .... ....                    | .... ....          | .... ....  |
|                                    | 185        | 195        | 205        | 215                          | 225                | 235        |
| <b>B.pertussis ATCC 9797</b>       | CGTGTGACC  | CCCCTGCCAT | GGTGTGAT   | <b>CC</b> <b>GTA</b> AAATAGG | <b>CACCATCA</b> AA | ACGCAGAGGG |
| <b>B.bronchiseptica AB 1254</b>    | TGTGCCGACC | CCCCTGCCAT | GGTGTGATCC | GCAAAATAGG                   | CGCCACCGAA         | ACGCAGAGGG |
| <b>B.bronchiseptica ATCC 786</b>   | TGTGCCGACC | CCCCTGCCAT | GGTGTGATCC | GCAAAATAGG                   | CGCCACCGAA         | ACGCAGAGGG |
| <b>B.bronchiseptica ATCC 19395</b> | CGTGCCGACC | CCCCTGCCAT | GGTGTGATCC | GCAAAATAGG                   | CGCCACCGAA         | ACGCAGAGGG |
| <b>B.parapertussis KP92\83\93</b>  | CGTGCCGACC | CCCCTGCCAT | GGTGTGATCC | GCAAAATAGG                   | CGCCACAGAA         | ACGCAGAGGG |
| <b>B.parapertussis KP92\437\93</b> | CGTGCCGACC | CCCCTGCCAT | GGTGTGATCC | GCAAAATAGG                   | CGCCACAGAA         | ACGCAGAGGG |
| <b>B.parapertussis ATCC 15311</b>  | CGTGCCGACC | CCCCTGCCAT | GGTGTGATCC | GCAAAATAGG                   | CGCCACAGAA         | ACGCAGAGGG |

....|....|  
245

|                                    |           |
|------------------------------------|-----------|
| <b>B.pertussis ATCC 9797</b>       | GAAGACGGG |
| <b>B.bronchiseptica AB 1254</b>    | GAAGACGGG |
| <b>B.bronchiseptica ATCC 786</b>   | GAAGACGGG |
| <b>B.bronchiseptica ATCC 19395</b> | GAAGACGGA |
| <b>B.parapertussis KP92\83\93</b>  | GAAGACGGA |
| <b>B.parapertussis KP92\437\93</b> | GAAGACGGA |
| <b>B.parapertussis ATCC 15311</b>  | GAAGACGGA |
